# Supplementary material
Source: PubMed Central journal article supplement (PMC3329222)

# Supplementary Figure 1

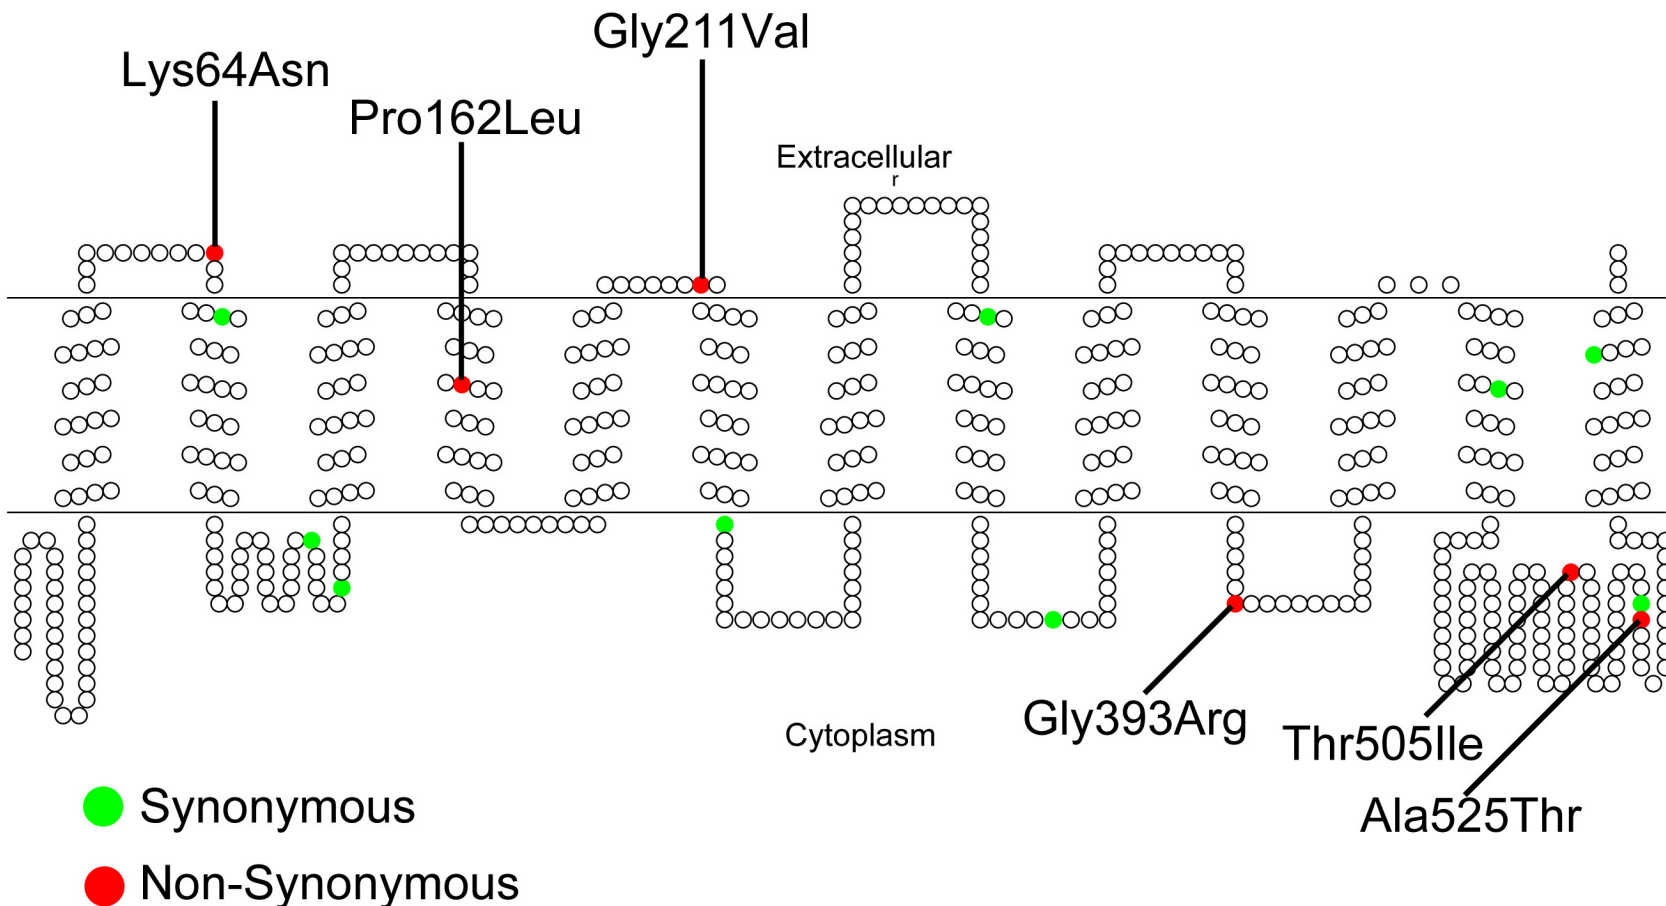

Supplement: NIHMS367378-supplement-Supplementary_Figure_1.pdf [file NIHMS367378-supplement-Supplementary_Figure_1.pdf]

Supplementary Figure 4.

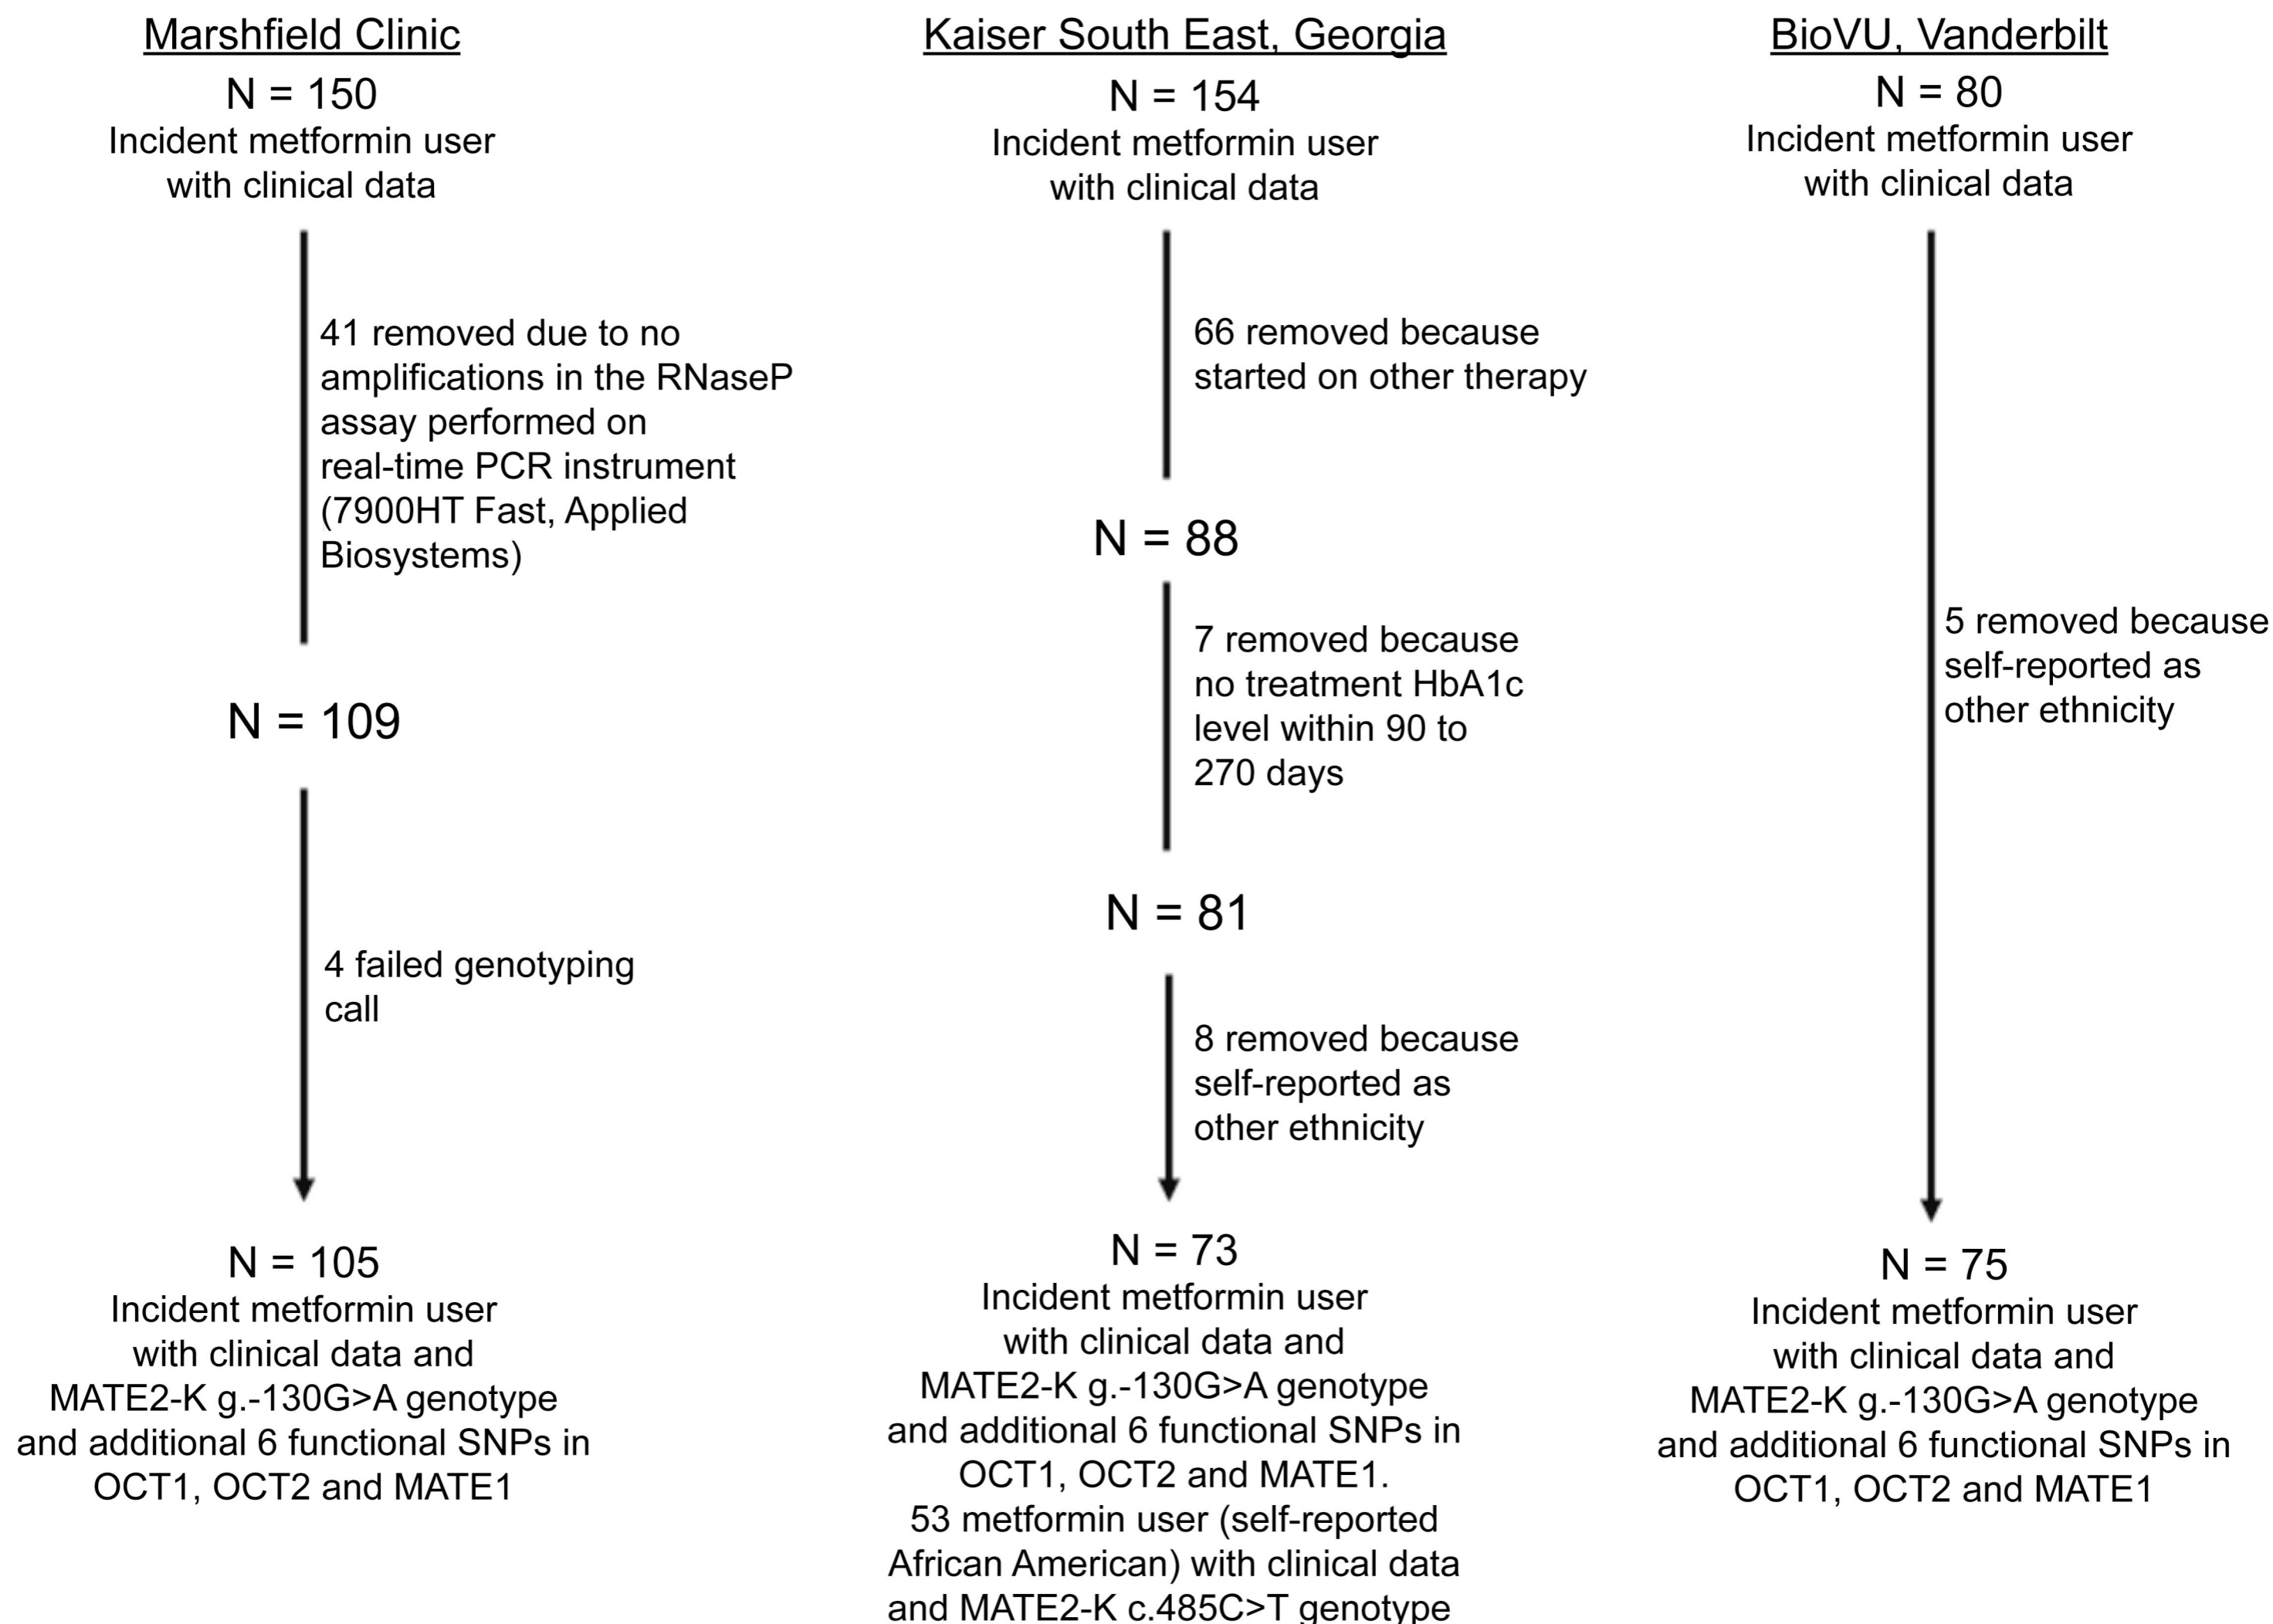

Supplement: NIHMS367378-supplement-Supplementary_Figure_4.pdf [file NIHMS367378-supplement-Supplementary_Figure_4.pdf]
